# Supplementary material for: Synthesis of ordered photoresponsive azobenzene–siloxane hybrids by self-assembly
Source: Royal Society of Chemistry journal article supplement (doi:10.1039/c3tc30587b), 2013-01-01
Supplement: c3tc30587b.pdf [file c3tc30587b.pdf]

## Electronic Supplementary Information (ESI)

### Synthesis of ordered photoresponsive azobenzene–siloxane hybrids by self-assembly

Sufang Guo, Ayae Sugawara-Narutaki, Tatsuya Okubo and Atsushi Shimojima

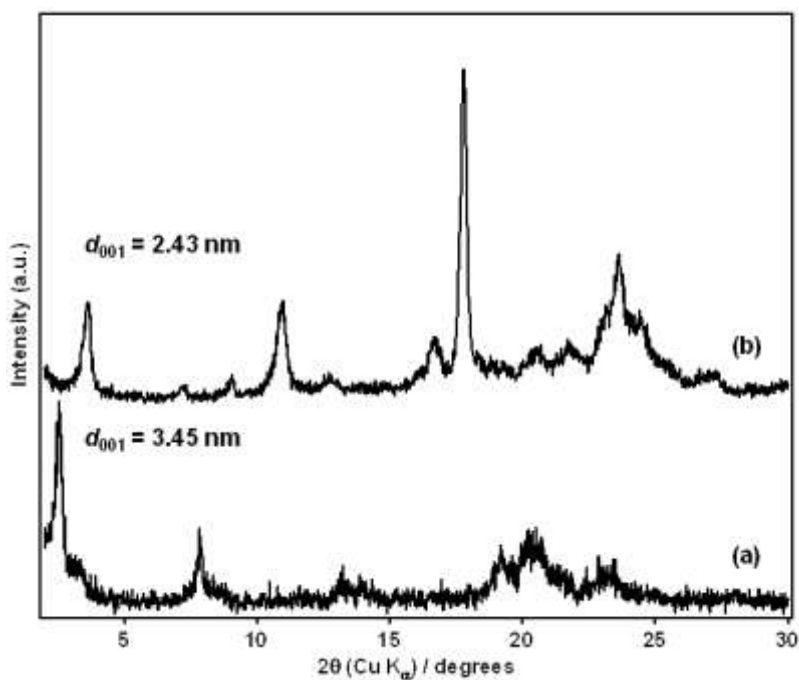

Fig. S1 XRD patterns of cast powders prepared from P1 (a) and P2 (b).

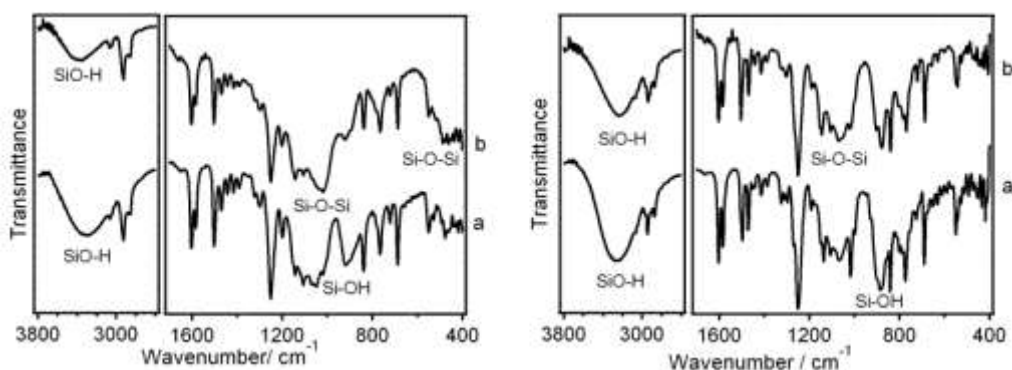

Fig. S2 FT-IR spectra of H1 (left) and H2 (right) before (a) and after (b) heating.

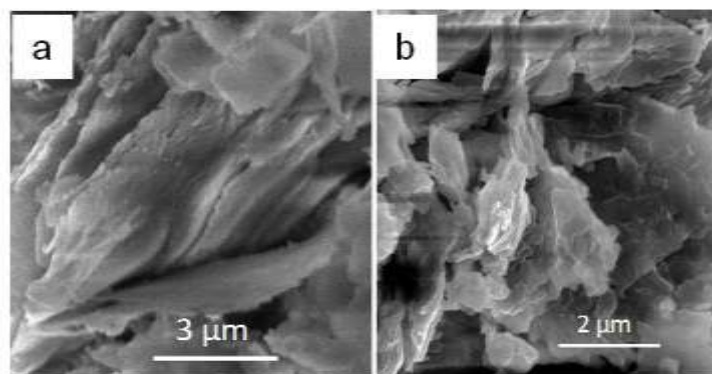

Fig. S3 FE-SEM images of the precipitates prepared from **P1** (a) and **P2** (b).

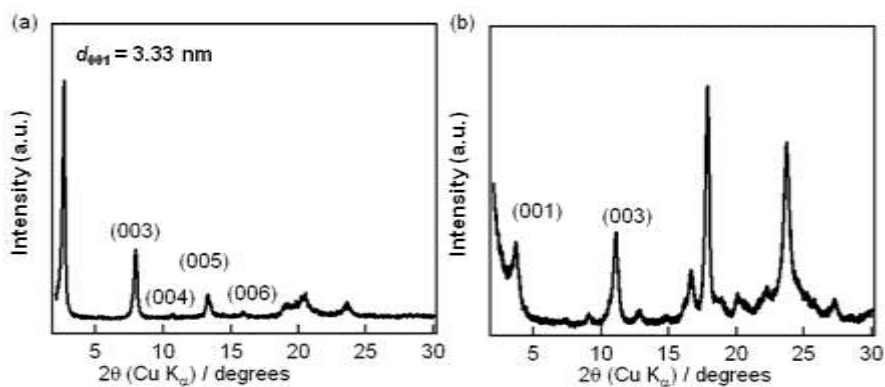

Fig. S4 XRD patterns of the precipitates prepared from (a) **P1** and (b) **P2**.

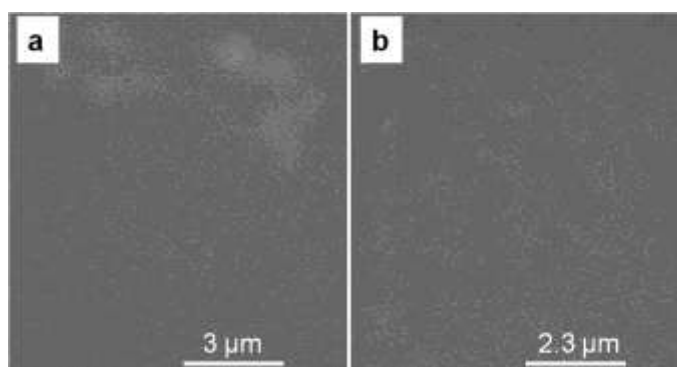

Fig S5 FE-SEM images of the top surfaces of (a) **H1'** and (b) **H2'**.

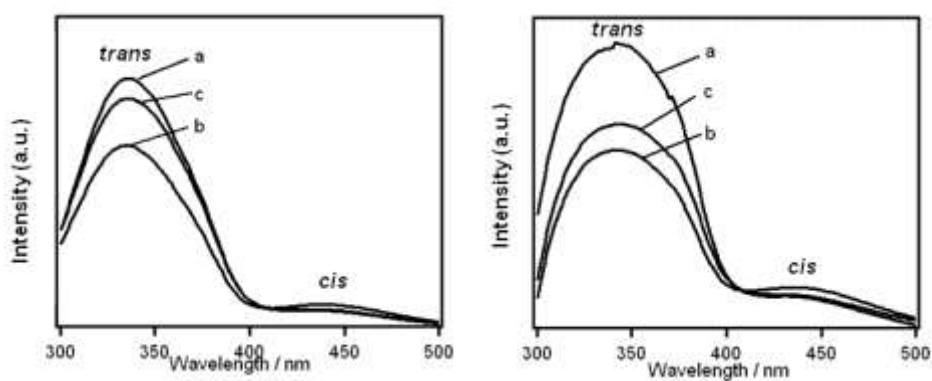

Fig. S6 UV/ Vis absorption spectra of swollen **H1'** (left) and swollen **H2'** (right): (a) before irradiation, (b) after 1 min of UV irradiation and (c) after 1min of visible light irradiation.
